# Supplementary material for: Atomistic Insights Into Charge Transfer and Lattice Thermal Transport in Boron-Functionalized Dwnt
Source: Research Square preprint supplement (doi:10.21203/rs.3.rs-8601393/v1), 2026-02-16
Supplement: Supplementary file 1 [file 729137a46af0de2e306920e4.docx]

**Atomistic insights into charge transfer and lattice thermal transport in**

**boron-functionalized DWNT.**


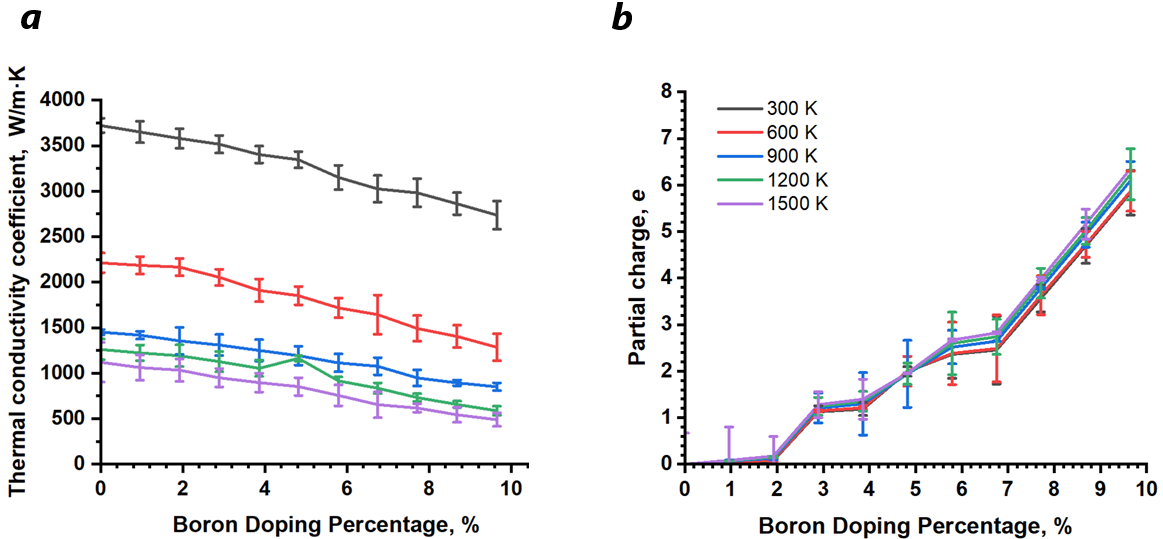


Fig. 2. (*a*) The variation of the thermal conductivity coefficient with doping amount and temperature, (*b*) The alteration in the partial charge of adsorbed B atoms in relation to temperature.
